# Supplementary material for: STIM2 protects hippocampal mushroom spines from amyloid synaptotoxicity
Source: PubMed Central journal article supplement (PMC4536802; doi:10.1186/s13024-015-0034-7), 2015-08-15
Supplement: 13024_2015_34_MOESM1_ESM.pdf [file 13024_2015_34_MOESM1_ESM.pdf]

**A**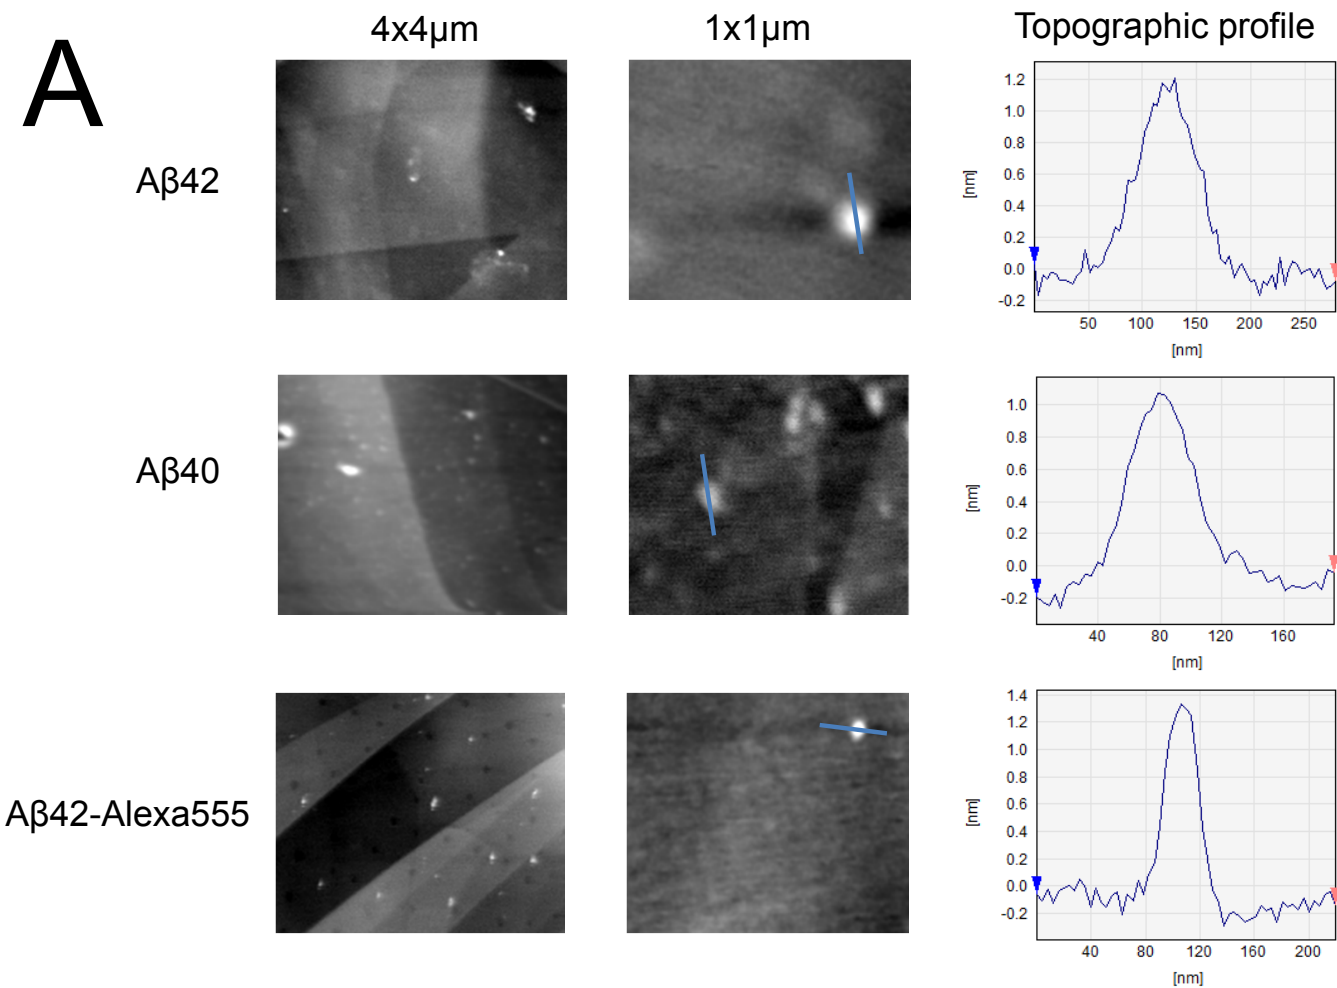**B**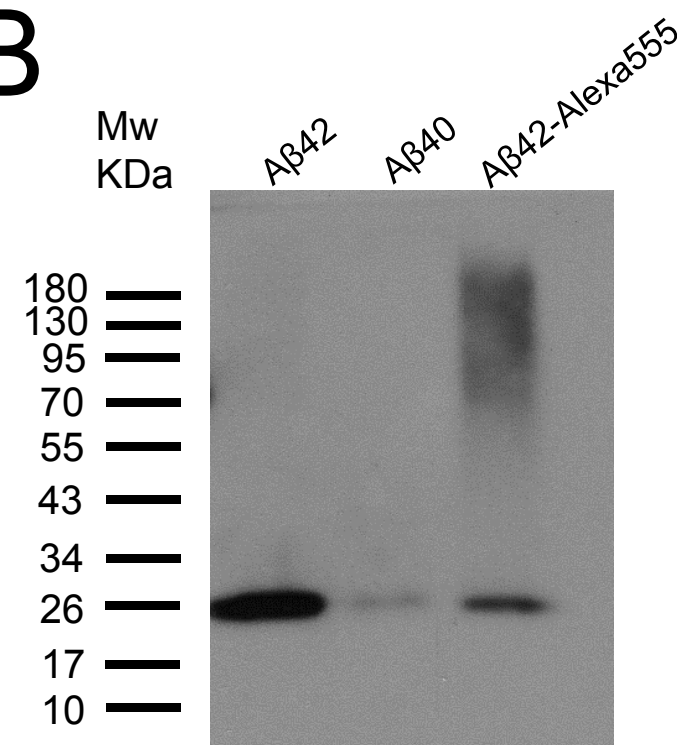

Supplementary Fig 1
