# Supplementary material for: STIM2 protects hippocampal mushroom spines from amyloid synaptotoxicity
Source: Springer Nature journal article supplement (doi:10.1186/s13024-015-0034-7), 2015-08-14
Supplement: MOESM2 [file 9776468]

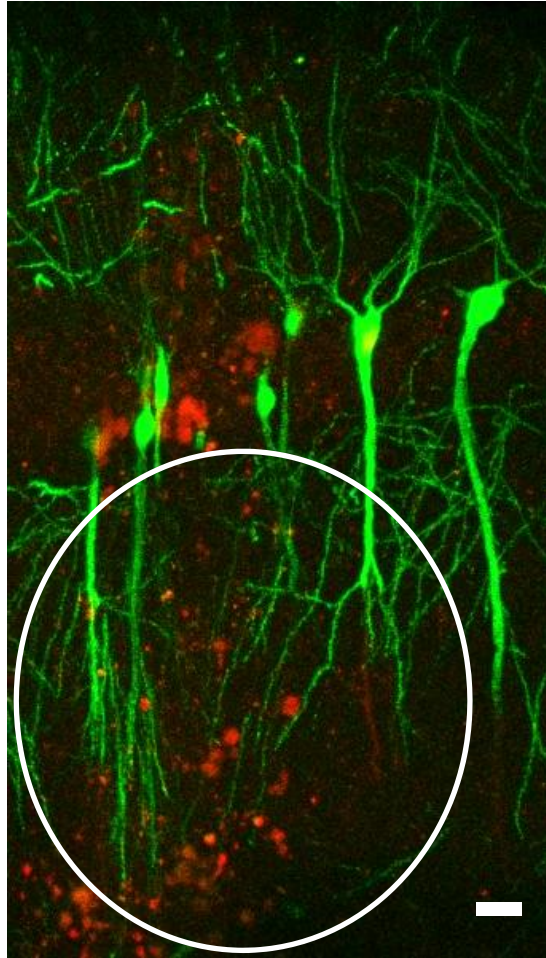

Supplementary Fig 2
